# Supplementary material
Source: PubMed Central journal article supplement (PMC5729520)
Supplement: cdd2017143x1.pdf [file cdd2017143x1.pdf]

# Supplemental data :

S1

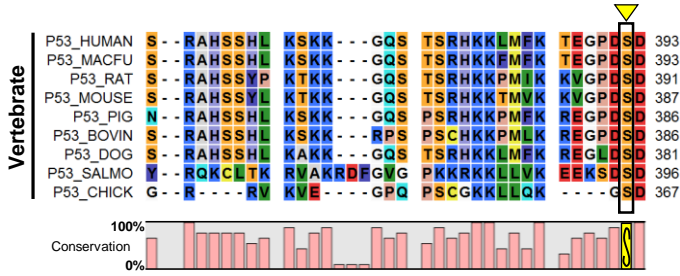

S2. A

## Strategy - STEP 1:

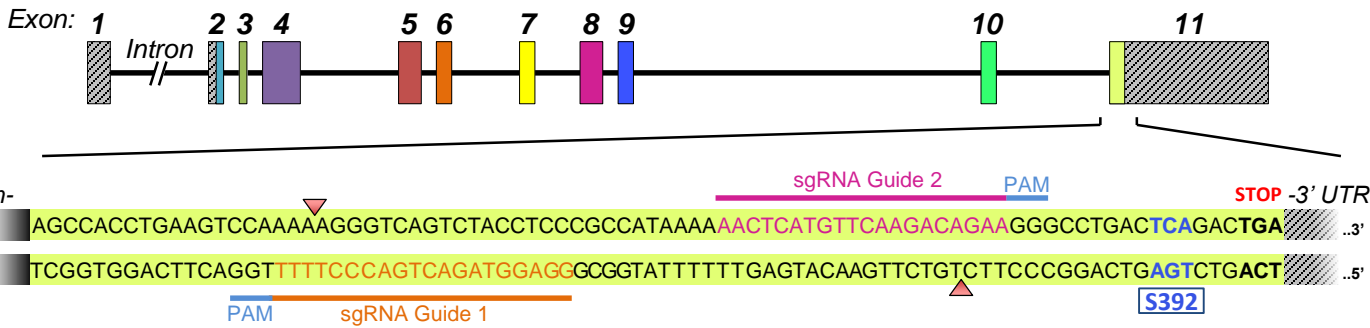

## Repair template – 200 bases:

Single-stranded DNA oligonucleotide (ssODN)

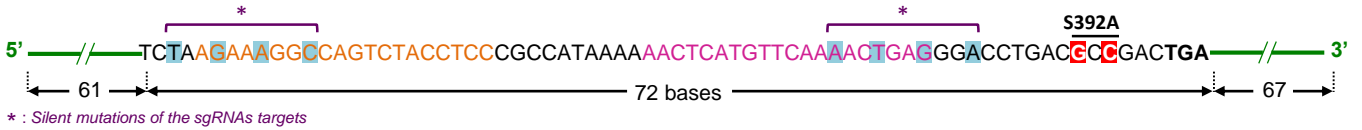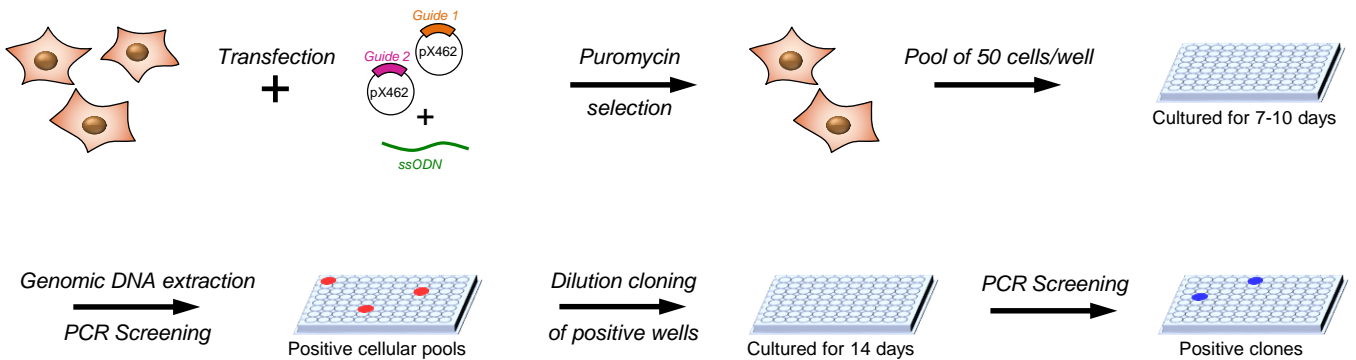

Characterization of the positive clones

- Exon sequencing
- cDNA sequencing
- Protein expression

## Protein expression:

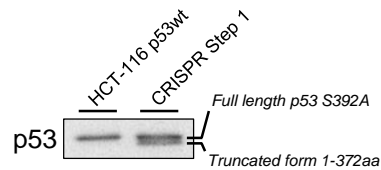

## Result after the first p53 CRISPR editing:

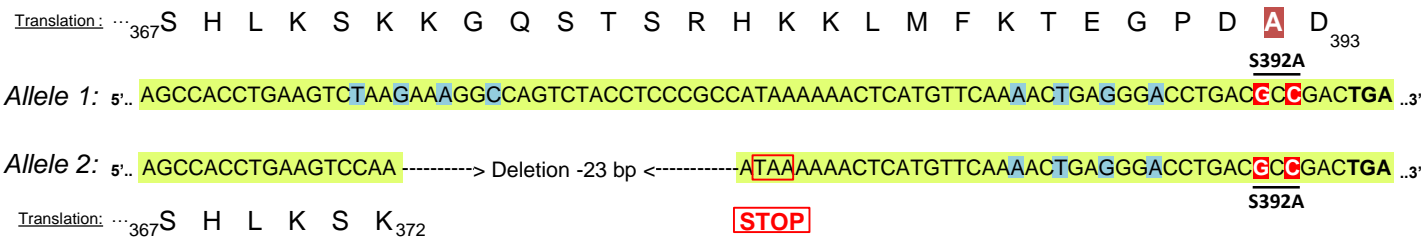

# Supplemental data :

## S2. B

### Strategy - STEP 2:

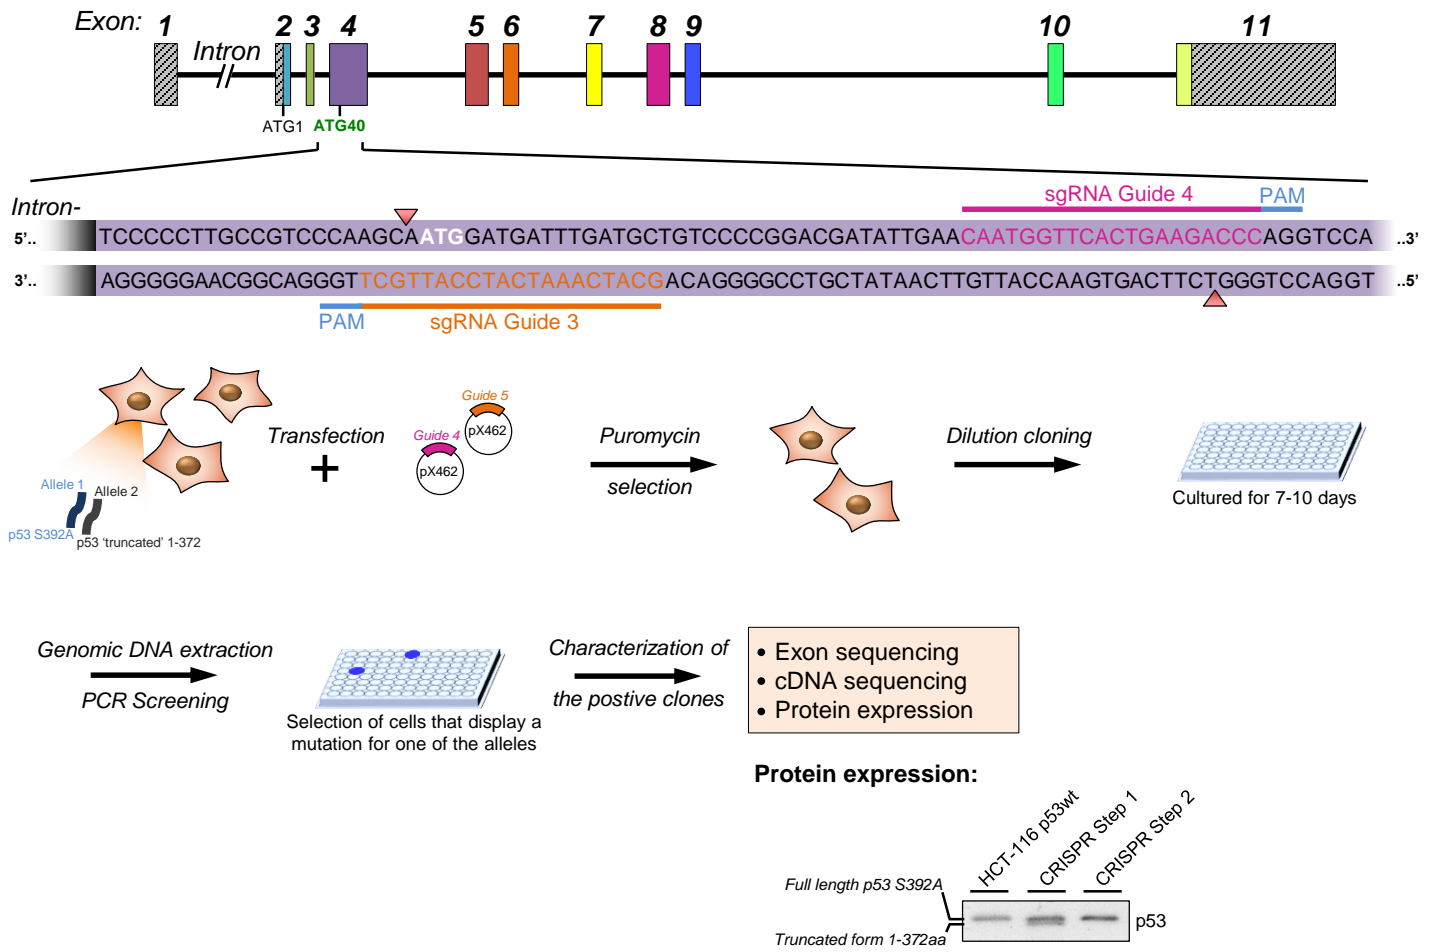

### Result after STEP 2 – HCT-116 p53 S392A +/- :

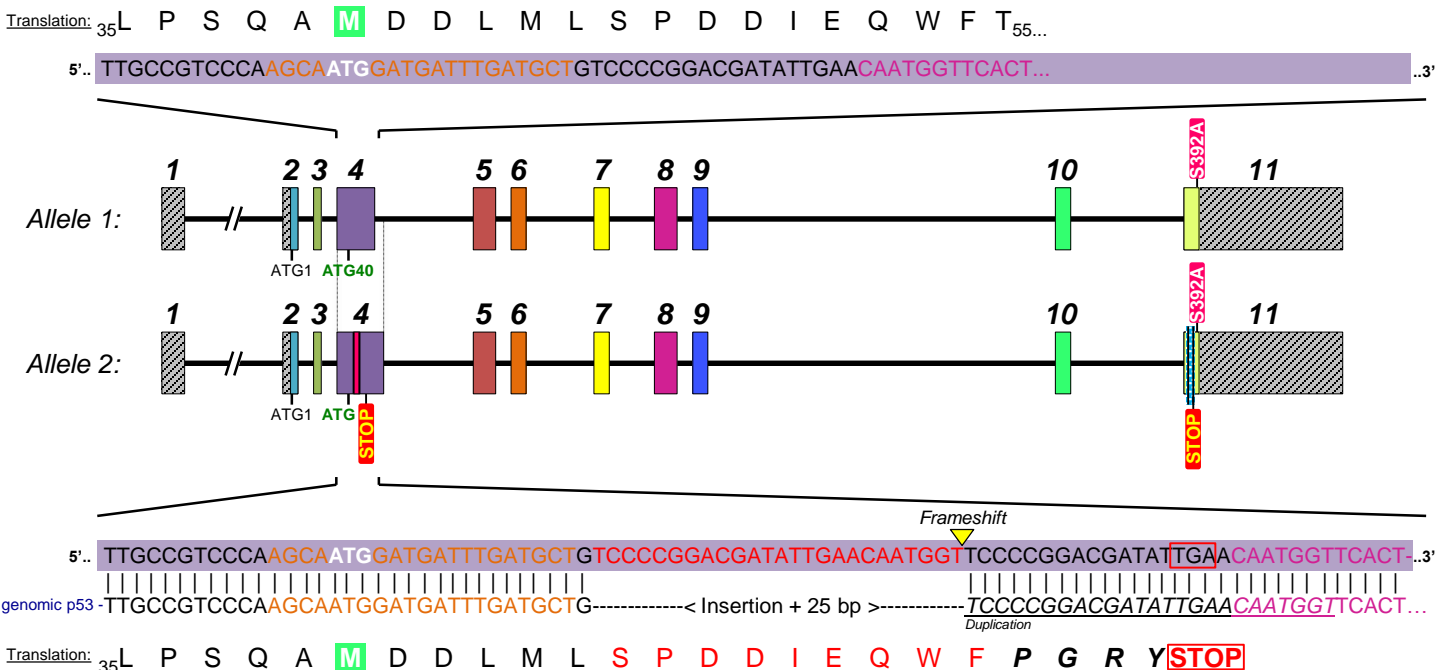

# Supplemental data :

## S3

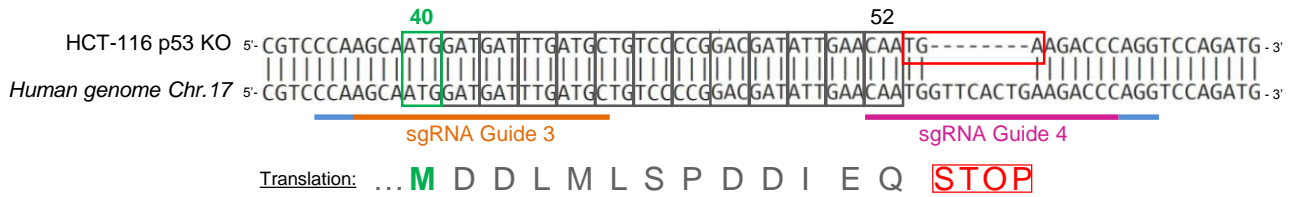

## S4

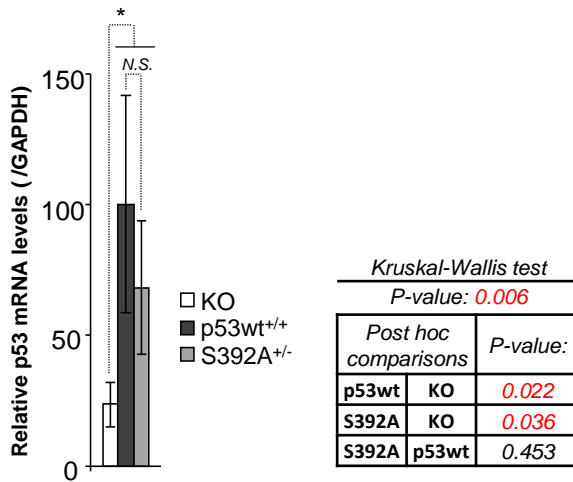

## S5

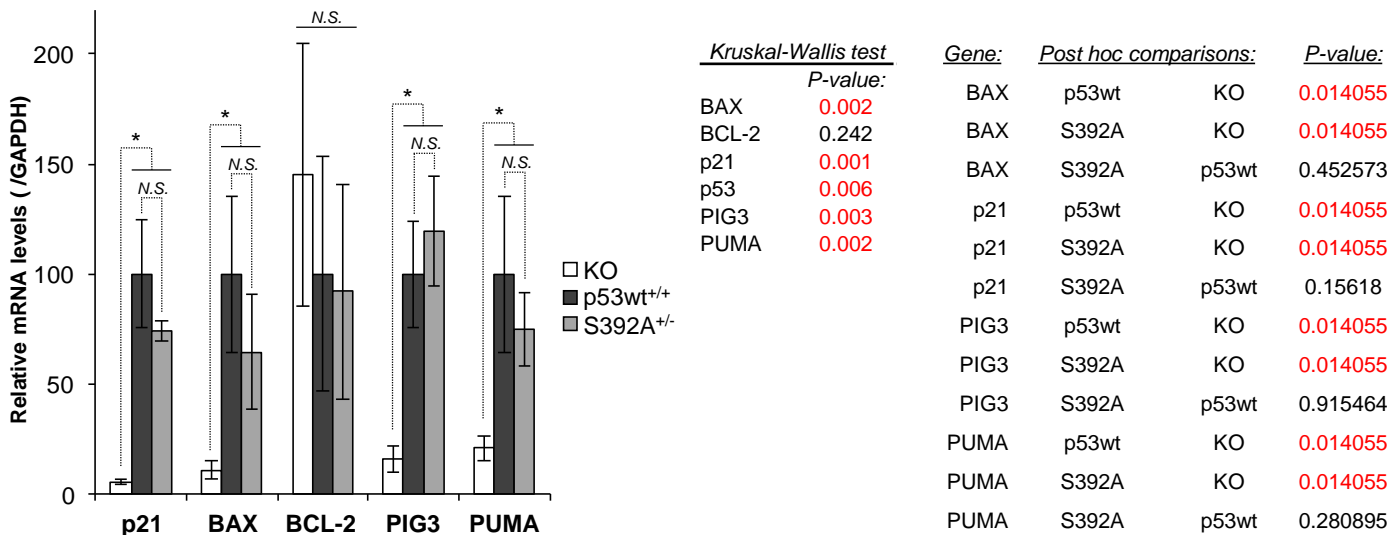

# Supplemental data :

**S6**

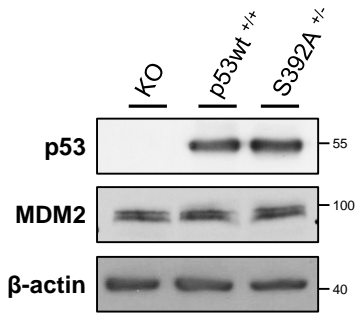

**S7**

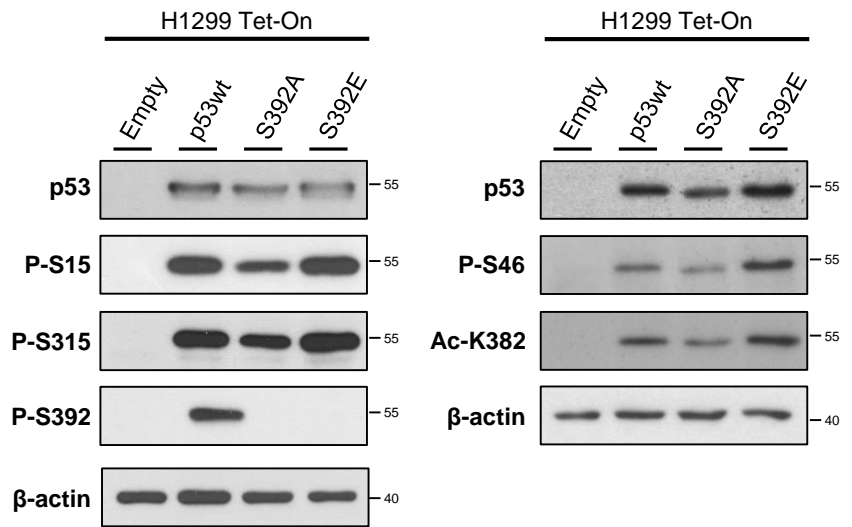

**S8**

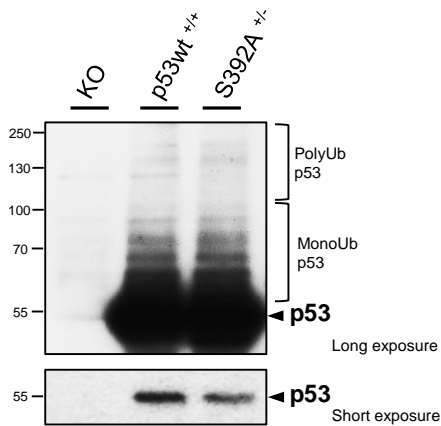

**S9**

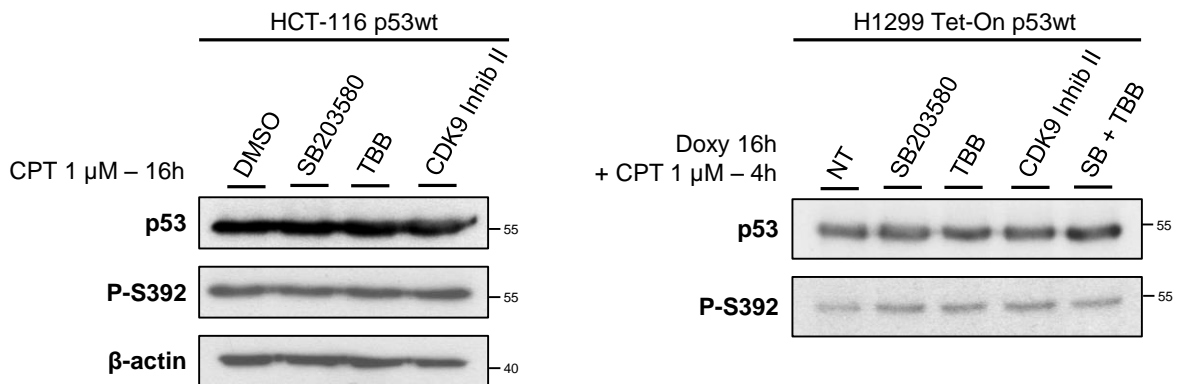



# Supplemental data :

## S12

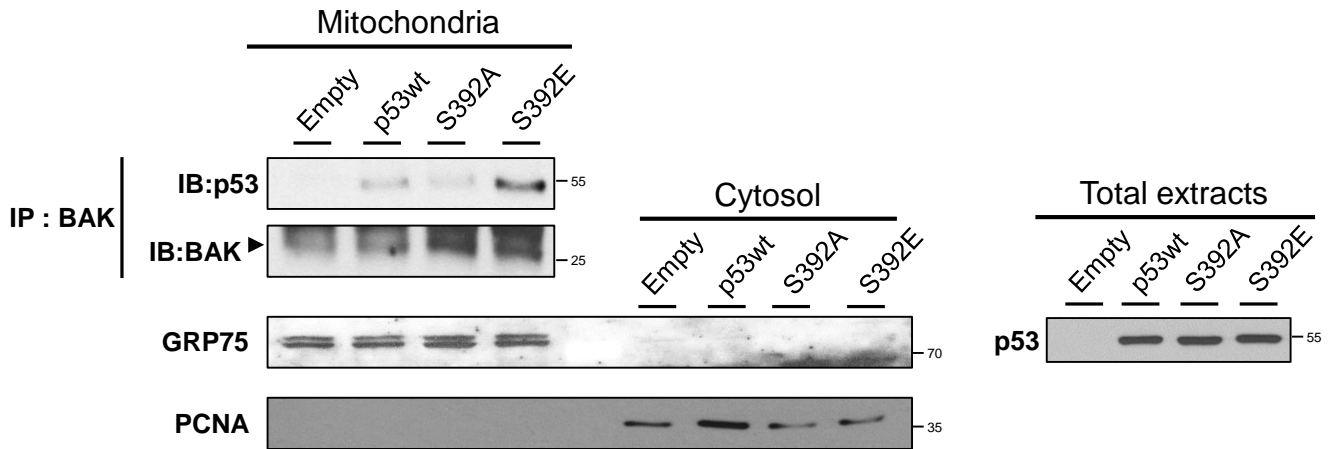

## S13

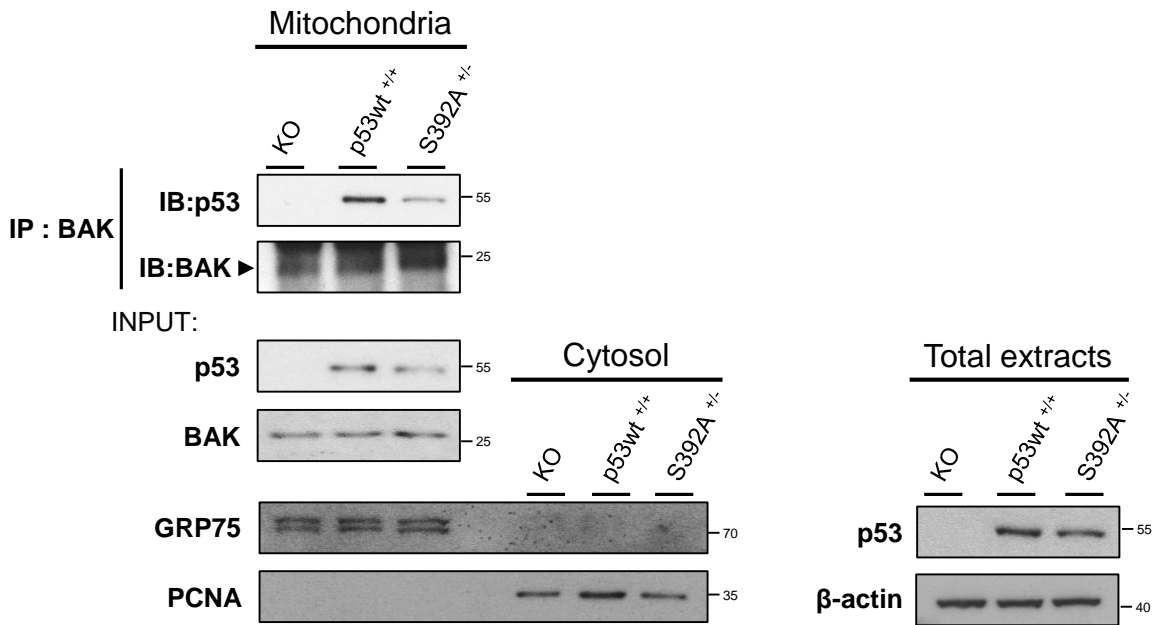

## S14

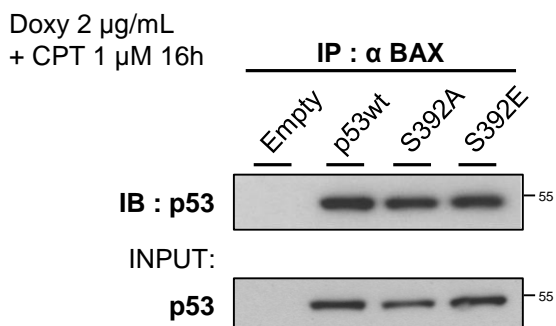

# Supplemental data :

## Table S1

Detailed statistical analyses of the data from figure 2F with the exact P-values obtained.

| ANOVA 1                      |        |        |        |        |        |        |        |        |
|------------------------------|--------|--------|--------|--------|--------|--------|--------|--------|
| CPT conc. ( $\mu\text{M}$ ): | 0.01   | 0.02   | 0.04   | 0.06   | 0.08   | 0.1    | 0.15   | 0.2    |
| P-value:                     | 0.0409 | 0.0004 | 0.0001 | 0.0012 | <.0001 | 0.0014 | <.0001 | <.0001 |

  

| Comparisons with p53wt using Dunnett's Method (P-values) |        |        |        |        |        |        |        |        |
|----------------------------------------------------------|--------|--------|--------|--------|--------|--------|--------|--------|
| CPT conc. ( $\mu\text{M}$ ):                             | 0.01   | 0.02   | 0.04   | 0.06   | 0.08   | 0.1    | 0.15   | 0.2    |
| Empty                                                    | 0.0254 | 0.0002 | 0.0001 | 0.0015 | <.0001 | 0.0021 | <.0001 | 0.0001 |
| S392A                                                    | 0.0466 | 0.0063 | 0.0023 | 0.0788 | 0.0015 | 0.0703 | 0.0033 | 0.0105 |
| S392E                                                    | 0.1920 | 0.2756 | 0.9624 | 0.9277 | 0.1645 | 0.8301 | 0.2671 | 0.4241 |

## Table S2

Detailed statistical analyses of the data from figure 3A with the exact P-values obtained.

### p21

| ANOVA 1   |        |        |        |        | Comparisons with p53wt using Dunnett's Method (P-values) |        |        |        |        |
|-----------|--------|--------|--------|--------|----------------------------------------------------------|--------|--------|--------|--------|
| Time (h): | 0      | 4      | 8      | 16     | Time (h):                                                | 0      | 4      | 8      | 16     |
| P-value:  | 0.0003 | 0.0013 | <.0001 | <.0001 | KO                                                       | 0.0005 | 0.0008 | <.0001 | <.0001 |
|           |        |        |        |        | S392A <sup>+/-</sup>                                     | 0.6275 | 0.0822 | 0.3482 | 0.1149 |

### PUMA

| ANOVA 1   |        |       |        |        | Comparisons with p53wt using Dunnett's Method (P-values) |        |        |        |        |
|-----------|--------|-------|--------|--------|----------------------------------------------------------|--------|--------|--------|--------|
| Time (h): | 0      | 4     | 8      | 16     | Time (h):                                                | 0      | 4      | 8      | 16     |
| P-value:  | 0.0011 | 0.003 | 0.0002 | 0.0015 | KO                                                       | 0.0025 | 0.0017 | 0.0003 | 0.0026 |
|           |        |       |        |        | S392A <sup>+/-</sup>                                     | 0.4229 | 0.1252 | 0.9286 | 0.7703 |

### BAX

| ANOVA 1   |        |        | Comparisons with p53wt using Dunnett's Method (P-values) |        |        |
|-----------|--------|--------|----------------------------------------------------------|--------|--------|
| Time (h): | 8      | 16     | Time (h):                                                | 8      | 16     |
| P-value:  | <.0001 | 0.0004 | KO                                                       | <.0001 | <.0001 |
|           |        |        | S392A <sup>+/-</sup>                                     | 0.0058 | 0.0771 |

# Supplemental data :

## Table S3

*Sequences of the ssODN and the DNA-Oligos used for CRISPR/Cas9n genome editing.*

| <b>ssODN sequence 5'-3'</b>                                                                                                                                                                                          |  |
|----------------------------------------------------------------------------------------------------------------------------------------------------------------------------------------------------------------------|--|
| CACAGACCCTCTCACTCATGTGATGTCATCTCTCCTCCCTGCTTCTGTCTCCTACAGCC<br>ACCTGAAGTCTAAGAAAGGCCAGTCTACCTCCC GCCATAAAAACTCATGTTCAA AACT<br>GAGGGACCTGACGCCGACTGACATTCTCCACTTCTTGTTC CCACTGACAGCCTCCCA<br>CCCCATCTCTCCCTCCCCTGCCA |  |

| <b>DNA-Oligos guide sequences cloned into PX462 v2.0</b> |                              |
|----------------------------------------------------------|------------------------------|
| S392_step1.sgRNA_1.UP                                    | CACCGGAGGTAGACTGACCCTTTT     |
| S392_step1.sgRNA_1.DOWN                                  | AAACAAAAGGGTCAGTCTACCTCC     |
| S392_step1.sgRNA_2.UP                                    | CACCGAACTCATGTTCAAGACAGAA    |
| S392_step1.sgRNA_2.DOWN                                  | AAACTTCTGTCTTGAACATGAGTTC    |
| ATG40_step2.sgRNA_3.UP                                   | CACCGCATCAAATCATCCATTGCT     |
| ATG40_step2.sgRNA_3.DOWN                                 | AAACAGCAATGGATGATTTGATGC     |
| ATG40_step2.sgRNA_4.UP                                   | CACCGCAATGGTTCCTGACTGAAGACCC |
| ATG40_step2.sgRNA_4.DOWN                                 | AAACGGGTCTTCAGTGAACCATTGC    |

## Table S4

*Primers used for quantitative real-time PCR analysis.*

| Targets | Primers (5'-3')                | Product length | Ref: |
|---------|--------------------------------|----------------|------|
| PUMA    | For: CGACCTCAACGCACAGTACGA     | 151            | 54   |
|         | Rev: AGGCACCTAATTGGGCTCCAT     |                |      |
| p21     | For: ACAGCAGAGGAAGACCATGTGGACC | 113            | 55   |
|         | Rev: CGTTTTCGACCCTGAGAGTCTCCAG |                |      |
| PIG3    | For: CCATGCAGGACTGAGTGGTG      | 103            | 56   |
|         | Rev: CTGCTCCAAGCTTTTCTGCC      |                |      |
| GAPDH   | For: CTGCCAACGTGTCAGTGGTG      | 104            | 56   |
|         | Rev: TCAGTGTAGCCCAGGATGCC      |                |      |
| BAX     | For: GAGAGGTCTTTTTCCGAGTGG     | 85             | 57   |
|         | Rev: CCTTGAGCACCAGTTTGCTG      |                |      |
| BCL-2   | For: CTGCACCTGACGCCCTTCACC     | 119            | 58   |
|         | Rev: CACATGACCCACCGAACTCAAAGA  |                |      |
